# Effects of Intravenous Anesthetic Agents on Glutamate Release

## A Role for GABA<sub>A</sub> Receptor-Mediated Inhibition

Donal J. Buggy, M.D., M.Sc., D.M.E., M.R.C.P.I., F.F.A.R.C.S.I.,\* Beverley Nicol, Ph.D.,†  
David J. Rowbotham, M.D., M.R.C.P., F.F.A.R.C.S.I., F.R.C.A.,‡ David G. Lambert, Ph.D.§

**Background:** Many anesthetic agents are known to enhance the  $\alpha_1\beta_2\gamma_{2s}$   $\gamma$ -aminobutyric acid type A (GABA<sub>A</sub>) chloride current; however, they also depress excitatory neurotransmission. The authors evaluated two hypotheses: intravenous anesthetic agents inhibit glutamate release and any observed inhibition may be secondary to GABA<sub>A</sub> receptor activation.

**Methods:** Cerebrocortical slices were prepared from Wistar rats. After perfusion in oxygenated Krebs buffer for 60 min at 37°C, samples for glutamate assay were obtained at 2-min intervals. After 6 min, a 2-min pulse of 46 mM K<sup>+</sup> was applied to the slices (S<sub>1</sub>); this was repeated after 30 min (S<sub>2</sub>). Bicuculline (1–100  $\mu$ M) was applied when the S<sub>1</sub> response returned to basal level, and 10 min later, thiopental (1–300  $\mu$ M), propofol (10  $\mu$ M), or ketamine (30  $\mu$ M) were also applied until the end of S<sub>2</sub>. Perfusate glutamate concentrations were measured fluorometrically, and the area under the glutamate release curves was expressed as a ratio (S<sub>2</sub>/S<sub>1</sub>).

**Results:** Potassium (46 mM) evoked a monophasic release of glutamate during S<sub>1</sub> and S<sub>2</sub>, with a mean control S<sub>2</sub>/S<sub>1</sub> ratio of  $1.07 \pm 0.33$  (mean  $\pm$  SD, n = 96). Ketamine and thiopental produced a concentration-dependent inhibition of K<sup>+</sup>-evoked glutamate release with half-maximum inhibition of release values of 18.2 and 10.9  $\mu$ M, respectively. Release was also inhibited by propofol. Bicuculline produced a concentration dependent reversal of thiopental inhibition of glutamate release with a half-maximum reversal of the agonist effect of 10.3  $\mu$ M. Bicu-

culline also reversed the effects of propofol but not those of ketamine.

**Conclusions:** The authors' data indicate that thiopental, propofol, and ketamine inhibit K<sup>+</sup>-evoked glutamate release from rat cerebrocortical slices. The inhibition produced by thiopental and propofol is mediated by activation of GABA<sub>A</sub> receptors, revealing a subtle interplay between GABA-releasing (GABAergic) and glutamatergic transmission in anesthetic action. (Key words: Depolarization; GABA<sub>A</sub> antagonist; mechanisms of anesthesia; neurotransmitter release; rat cerebrocortical slices.)

GLUTAMATE is the predominant excitatory amino acid neurotransmitter in the mammalian central nervous system acting on *N*-methyl-D-aspartate (NMDA),  $\alpha$ -amino-3-hydroxy-5-methyl-4-isoxazolepropionic acid (AMPA), kainate, and metabotropic receptors.<sup>1,2</sup> Glutamatergic transmission may have a role in learning and memory, central pain transduction, and the pathophysiology of neuronal death after brain injury.<sup>2</sup> Although little is known about the precise molecular target site or sites for anesthetic agents, inhibition of excitatory neurotransmission and activation of inhibitory neurotransmission have been proposed as logical modes of action.<sup>3</sup> There is broad agreement that general anesthetics have a greater effect on synaptic transmission than on an axonal impulse propagation, and a range of anesthetic agents are known to inhibit the release of a number of neurotransmitters.<sup>4–6</sup>

Potentiation of inhibitory neurotransmission *via* enhancement of  $\alpha_1\beta_2\gamma_{2s}$   $\gamma$ -aminobutyric acid type A (GABA<sub>A</sub>)-mediated chloride conductance, prolonging and enhancing inhibitory postsynaptic potentials, is a theory of anesthetic action backed by considerable evidence.<sup>6,7</sup> However, there is growing evidence that general anesthetics also attenuate excitatory neurotransmission in the central nervous system, particularly at glutamate synapses.<sup>1–3,5,8,9</sup> Glutamatergic neurotransmission and glutamate receptor-activated responses

\* Senior Lecturer.

† Research Fellow. Current position: Pfizer Central Research, Sandwich, Kent, United Kingdom.

‡ Professor of Anaesthesia and Pain Management.

§ Senior Lecturer in Anaesthetic Pharmacology.

Received from the University Department of Anaesthesia and Pain Management, Leicester Royal Infirmary, Leicester, United Kingdom. Submitted for publication June 29, 1999. Accepted for publication October 25, 1999. Supported in part by Leicester Royal Infirmary NHS Trust, Leicester, United Kingdom. Presented in part at the American Society of Anesthesiologists Annual Scientific Meeting, Orlando, Florida, October 17–21, 1998, and at the Anaesthetic Research Society, Aberdeen, United Kingdom, March 25–26, 1999.

Address reprint requests to Dr. Lambert: University Department of Anaesthesia and Pain Management, Leicester Royal Infirmary, Leicester LE1 5WW, United Kingdom. Address electronic mail to: DGL3@le.ac.uk

have been shown to be inhibited by both intravenous and inhalational agents both.<sup>9-11</sup> Net synaptic concentrations of glutamate are a balance between reuptake and release, and we have previously shown that clinically relevant concentrations of most commonly used anesthetic agents did not affect reuptake of [<sup>3</sup>H]-glutamate into rat cerebrocortical and cerebellar synaptosomes.<sup>12</sup>

Our objectives in this series of studies were to evaluate two hypotheses: that intravenous anesthetic agents inhibit glutamate release and whether this inhibition is a direct effect on glutamatergic neurons or an indirect effect *via* an action at the GABA<sub>A</sub> receptor. We studied the interaction of thiopental, propofol, and ketamine with bicuculline (a GABA<sub>A</sub> antagonist) on 46-mM K<sup>+</sup>-evoked glutamate release from rat cerebrocortical slices.

## Materials and Methods

### *Preparation of Cerebrocortical Slices and Perfusion Protocol*

Female Wistar rats (250–300 g) were killed by cervical dislocation and decapitation. The brain was rapidly removed and placed in ice-cold oxygenated (95% O<sub>2</sub>, 5% CO<sub>2</sub>) bicarbonate buffer, pH 7.4, of the following composition: 115 mM NaCl; 4.7 mM KCl; 2.0 mM CaCl<sub>2</sub>; 1.2 mM MgCl<sub>2</sub>; 25 mM NaHCO<sub>3</sub>; and 8.8 mM glucose. The cortex was dissected from the other cerebral structures, cut into 350 × 350 μm slices using a MacIlwain Tissue Chopper (Mickle Lab Engineering Co. Ltd., Surrey, UK), and suspended in bicarbonate buffer. After being washed three times in fresh bicarbonate buffer, slices were agitated in a shaking water bath at 37°C for 40 min. Approximately 1 ml gravity-packed slices (protein not determined) were pipetted into a perfusion chamber and held in place by a greased diffuser. The perfusion chamber consisted of a 2-ml syringe barrel cut at approximately 2 cm and packed at the needle end with a 0.5-cm-thick layer of glass wool. The chamber was sealed around the diffuser with two O-rings. The perfusate entered the diffuser *via* a peristaltic pump, which provided a continuous, steady flow to the cerebrocortical slices at the diffuser end and exited at the needle end of the syringe, with the eluate being collected by a fraction collector. Slices were perfused at 37°C at 1 ml/min for 60 min to allow for stabilization before collection of 2-min fractions for the estimation of glutamate concentrations. After 6 min of perfusion, 46 mM K<sup>+</sup> (Na<sup>+</sup> adjusted to maintain tonicity) was applied (total K<sup>+</sup> was

therefore 46 + 4.7 mM = 50.7 mM) for 2 min (S<sub>1</sub>). Slices were perfused for an additional 30 min prior to the second application of a 2-min pulse of 46 mM K<sup>+</sup> (S<sub>2</sub>). Fractions were collected for 8 min after S<sub>2</sub>.

### *Measurement of Endogenous Glutamate Release*

The fractions collected were analyzed for glutamate using an adaptation of the fluorescence method previously described.<sup>13</sup> Glutamate dehydrogenase catalytically reduces any glutamate present to 2-oxoglutarate, accompanied by the reduction of NAD<sup>+</sup>/NADP (nicotinamide adenine nucleotides) to NADH/NADPH. As NADH undergoes reoxidation, NADP<sup>+</sup> is used.<sup>13</sup> Assay volume was 500 μl and consisted of 15 μl of glutamate dehydrogenase (final concentration, 30 U), 5 μl of NADP (final concentration, 1 mM), and 480 μl of perfusate. The mixture was incubated at 37°C for 10 min, and fluorescence intensity was determined using a Perkin-Elmer LS50B (Beaconsfield, Bucks, UK) spectrofluorometer with excitation and emission wavelengths set at 366 and 430 nm, respectively. Perfusate sample fluorescence intensity was then compared with a known set (0.5–20 pmol) of glutamate standards.

### *Introduction of Anesthetic Agents and Bicuculline*

Thiopental (3–300 μM), propofol (10 μM), and ketamine (3–300 μM) were introduced to the buffer immediately after S<sub>1</sub> until the end of the experiment (thus including S<sub>2</sub>). In some experiments, 100 μM pentobarbital and 300 μM barbituric acid were included as additional active and inactive barbiturates, and 1 μM dizocilpine (MK-801) was included as a noncompetitive NMDA receptor antagonist. In experiments using 1–100 μM bicuculline, it was introduced when S<sub>1</sub> response had returned to the basal level by perfusing the slices with a solution of the relevant concentration of bicuculline. After 10 min, coincubation of bicuculline with 100 μM thiopental, 10 μM propofol, or 30 μM ketamine took place until the end of S<sub>2</sub>. Control response with and without a high and low concentration of test agent were obtained from a single rat (*i.e.*, three conditions per animal), and these data were combined to produce a full concentration response curve.

### *Data Analysis*

Time course of glutamate release is presented relative to the mean of the first three basal samples collected during S<sub>1</sub> or S<sub>2</sub>. This measurement both confirms slice

## ANESTHETIC INHIBITION OF GLUTAMATE RELEASE AND BICUCULLINE

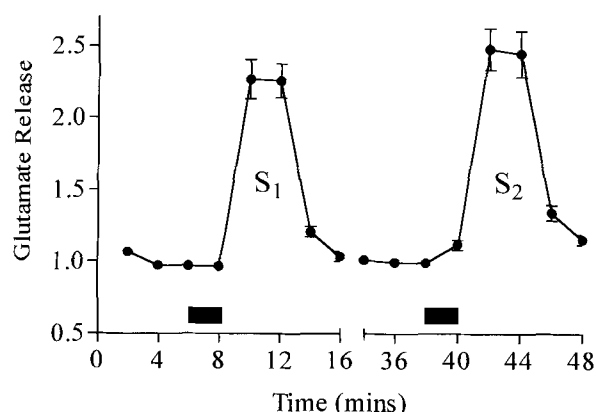

Fig. 1. Effects of 46 mM  $K^+$  (solid bar) on glutamate release from perfused rat cerebrocortical slices. Slices were challenged twice ( $S_1$  and  $S_2$ ); challenges were separated by 30 min. Release is expressed relative to the mean of the first three fractions collected during  $S_1$  or  $S_2$ . The effects of anesthetic agents and bicuculline added for various times after  $S_1$  on  $S_2$  were investigated.  $S_2/S_1$  ratios are calculated from the area under both stimulation profiles. Data are mean  $\pm$  SEM and are from the 96 control experiments performed during the entire study.

responsiveness ( $S_1$ ) and normalizes for differences in protein content among experiments. The areas under the stimulation curves ( $S_1$  and  $S_2$ ) were then calculated and data presented as  $S_2/S_1$  ratio. In some experiments, the inhibition of this ratio is presented. Statistical analysis was performed using Student paired  $t$  test for paired comparisons of  $S_2/S_1$  ratios and analysis of variance when a series of comparisons was necessary.  $P < 0.05$  was taken as an indication of statistical significance. The

analysis of concentration-response curves in release and release-inhibition studies to yield half-maximum inhibition of release ( $EC_{50}$ ; *i.e.*, an agonist effect), and half-maximum reversal of the agonist effect ( $IC_{50}$ ) was performed using computer-assisted curve fitting (sigmoid concentration response curve-variable slope) on GraphPad Prism 2.0. (GraphPad Software, San Diego, CA). Because each concentration response curve is produced from data collected from multiple experiments, it is not possible to derive error estimates for these values.

## Results

### $K^+$ -evoked Release

Addition of 46 mM  $K^+$  produced monophasic releases of glutamate during both  $S_1$  and  $S_2$  from perfused rat cerebrocortical slices. Over the entire study, the control ( $n = 96$ )  $S_2/S_1$  ratio was  $1.07 \pm 0.33$  (mean  $\pm$  SD; fig. 1). There was considerable variation in the  $S_2/S_1$  ratio (95% confidence interval, 1.00–1.13; range, 0.47–1.88) between animals, but each animal acted as its own control. Glutamate release from rat cerebrocortical slices was dependent on extracellular  $Ca^{2+}$  (data not shown), indicating exocytotic release of vesicular glutamate and not reversal of the glutamate uptake transporter.

### Effects of Intravenous Agents

Thiopental (fig. 2) and ketamine (fig. 3) produced a concentration-dependent inhibition of 46 mM  $K^+$ -evoked

Fig. 2. (A)  $K^+$ -evoked (46 mM) glutamate release from perfused rat cerebrocortical slices was inhibited in a concentration-dependent manner by thiopental. (B) Thiopental (100  $\mu$ M) inhibition of glutamate release was reversed in a concentration-dependent manner by bicuculline. Percent inhibition of release was calculated from the  $S_2/S_1$  ratios obtained as shown in figure 1, and inhibition is denoted by a downward deflection in the concentration response curve (*i.e.*, 0 = no inhibition;  $-60 = 60\%$  inhibition). Data are mean  $\pm$  SEM ( $n \geq 5$ ). Estimated half-maximum inhibition of release for thiopental occurred at 10.9  $\mu$ M.

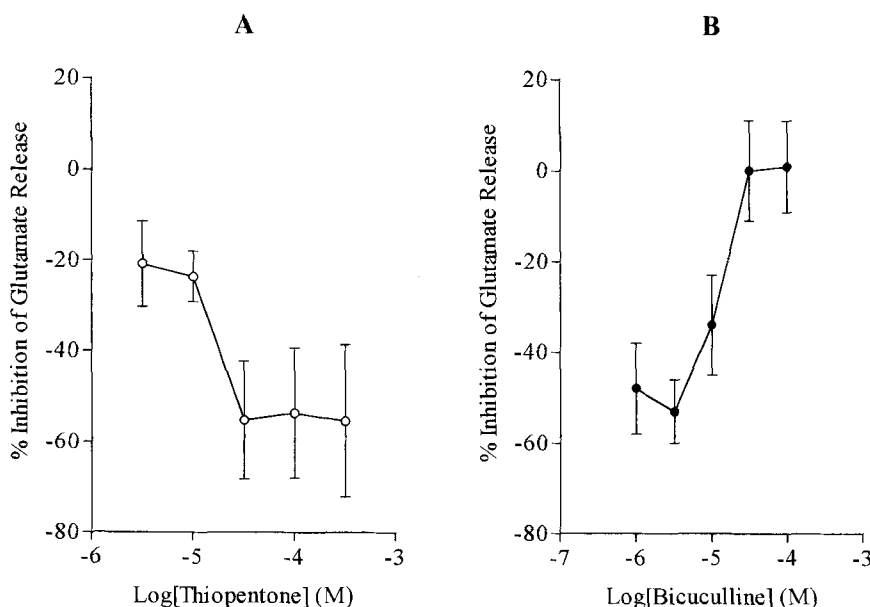

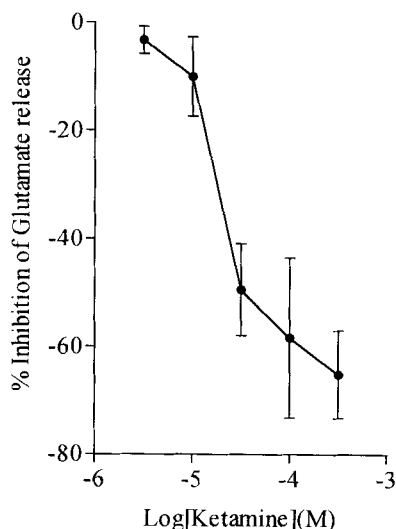

Fig. 3.  $K^+$ -evoked (46 mM) glutamate release from perfused rat cerebrocortical slices was inhibited in a concentration-dependent manner by ketamine. Percent inhibition of release was calculated from the  $S_2/S_1$  ratios obtained as shown in figure 1, and inhibition is denoted by a downward deflection in the concentration response curve (i.e., 0 = no inhibition; -60 = 60% inhibition). Data are mean  $\pm$  SEM ( $n \geq 5$ ). The estimated half-maximum inhibition of release value for thiopental was 18.2  $\mu$ M.

glutamate release from rat cerebrocortical slices with maximum inhibition of  $55.4 \pm 16.8\%$  and  $65.1 \pm 8.1\%$ , respectively, produced at 100  $\mu$ M. The  $EC_{50}$  for this inhibition was 18.2 and 10.9  $\mu$ M, respectively (figs. 2A and 3). In addition, 100  $\mu$ M pentobarbital also significantly inhibited glutamate release by  $60.4 \pm 14.4\%$  ( $P < 0.05$ ). In contrast, the inactive barbiturate barbituric acid was ineffective. MK-801, a noncompetitive NMDA antagonist, inhibited release by  $81.2 \pm 7.5\%$  compared with control ( $P < 0.05$ ). At 10  $\mu$ M, propofol inhibited glutamate release by  $74.8 \pm 8.2\%$  ( $P < 0.05$ ).

#### Effect of Bicuculline on Anesthetic-induced Inhibition

In a separate series of pilot studies, we showed that bicuculline 100  $\mu$ M alone had no effect on 46 mM  $K^+$ -evoked glutamate release ( $S_2/S_1$  ratio control,  $1.01 \pm 0.10$ ; bicuculline,  $0.96 \pm 0.04$ ;  $P > 0.05$ ;  $n = 5$ ) and that this concentration also fully reversed 100- $\mu$ M thiopental-induced inhibition of release. We further probed this inhibitory effect of bicuculline by constructing a full concentration-response curve. Bicuculline produced a complete reversal of 100  $\mu$ M thiopental inhibition of release with an estimated  $IC_{50}$  of 10.9  $\mu$ M (fig. 2B).

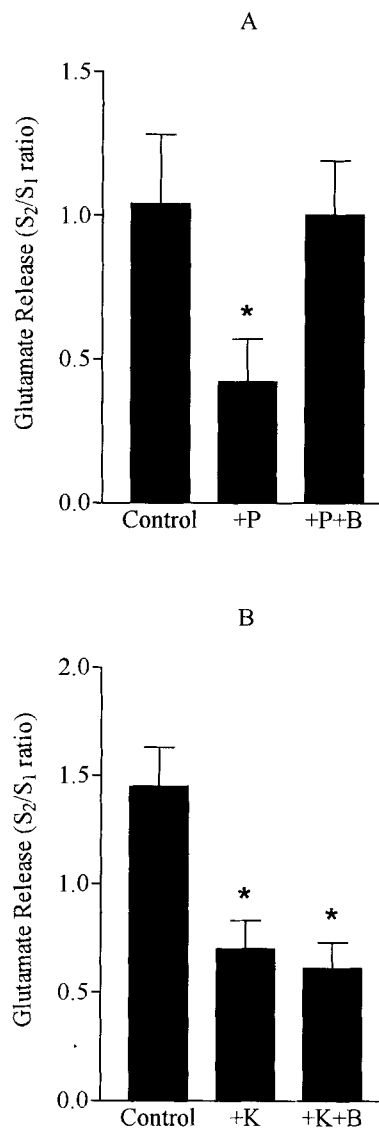

Fig. 4. (A) Propofol (P) (10  $\mu$ M), but not (B) ketamine (K) (30  $\mu$ M) inhibition of glutamate release from perfused rat cerebrocortical slices was reversed by bicuculline (B) 100  $\mu$ M.  $S_2/S_1$  ratios are presented as the mean  $\pm$  SEM ( $n \geq 5$ ). \* $P < 0.05$  reduced compared with control.

Bicuculline (100  $\mu$ M) also fully reversed the inhibition produced by propofol (fig. 4A). In contrast, the inhibition produced by 30  $\mu$ M ketamine was completely unaffected by bicuculline (fig. 4B).

#### Discussion

We report a reliable monophasic release of glutamate from perfused oxygenated rat cerebrocortical slices in

## ANESTHETIC INHIBITION OF GLUTAMATE RELEASE AND BICUCULLINE

Fig. 5. Schematic representation of the presumed interplay between GABAergic and glutamatergic transmission in the actions of thiopental, propofol, and ketamine. In this model, GABA released from GABAergic neurons reduces the release of glutamate from glutamatergic neurons. Thiopental, propofol, and ketamine inhibit the release of glutamate. Our data suggest that for thiopental and propofol, the inhibition is secondary to GABA<sub>A</sub> (filled circle) receptor activation—because the inhibition of glutamate release is reversed by the GABA<sub>A</sub> antagonist bicuculline. Ketamine reduced glutamate release *via* an action at the NMDA (filled square) receptor. Precise receptor locations are hypothetical. Ag = agonist; Ant = antagonist.

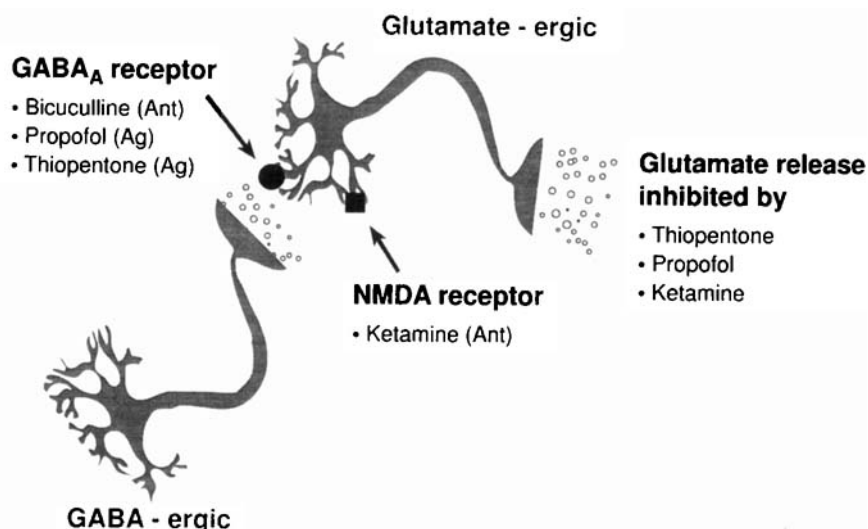

response to 46 mM K<sup>+</sup> depolarization. We used this model system to probe the effects of a range of intravenous anesthetic agents on glutamate release. We have clearly showed that ketamine, thiopental, and propofol markedly reduce glutamate release. In addition, MK-801 (a noncompetitive NMDA antagonist) and pentobarbital, but not barbituric acid, also significantly inhibit glutamate release. These data confirm our initial hypothesis that glutamate release is a target for intravenous anesthetic agents. Bicuculline, a GABA<sub>A</sub> antagonist, reversed the inhibition of 46 mM K<sup>+</sup>-evoked glutamate release produced by thiopental and propofol, suggesting that this inhibition of glutamate release is mediated indirectly *via* an agonist action at the GABA<sub>A</sub> receptor. As a negative control, the inhibition of release produced by the NMDA antagonist ketamine was unaffected by bicuculline. Collectively, our data indicate that there is a subtle interaction between glutamatergic and GABA-releasing (GABAergic) transmission in the production of the anesthetized state (fig. 5). In this model, it is assumed that GABA<sub>A</sub> receptor activation of glutamatergic neurons by thiopental and propofol results in hyperpolarization, which reduces the amount of glutamate released. *In vivo*, we envisage an interplay between GABAergic and glutamatergic transmission in the control of cortical activity, with release of transmitter from the former affecting glutamate release from the latter.

Enhancement of GABA<sub>A</sub> receptor activity has been championed by many authors as the principal target site for anesthetic agents.<sup>6,7,14-17</sup> Certainly, barbiturates have been shown to enhance the affinity of GABA for the GABA<sub>A</sub> receptor and to slow the dissociation of GABA

from its receptor.<sup>14,15</sup> Propofol has also been shown to enhance the inhibitory actions of GABA.<sup>14,16</sup> Recent work using chimeric receptor constructs has identified a 45-amino acid sequence on the GABA<sub>A</sub> receptor that is both necessary and sufficient to enhance receptor function, supporting the notion that ethanol and the volatile anesthetic agent enflurane act at this site to exert a specific effect on this important ion-channel protein.<sup>17</sup>

Our finding of reversal of an anesthetic effect by bicuculline (and hence an action at GABA<sub>A</sub> receptors) is supported by two electrophysiologic studies. In the first, using rat hippocampal CA1 slices, inhibition of electrically evoked population spikes by pentobarbital and propofol were completely reversed by bicuculline, but ketamine had no such effect<sup>18</sup>; however, glutamate release was not measured. Another study, also using rat hippocampal CA1 slices, found that halothane and isoflurane reduced glutamate transmission (excitatory postsynaptic potentials), but the reduction was completely insensitive to bicuculline 10 μM.<sup>19</sup> The underlying mechanism of the discrepancy between intravenous agents and volatile agents in their susceptibility to reversal by bicuculline is unclear but clearly warrants further investigation.

The IC<sub>50</sub> of 10.9 μM for the reversal of thiopental inhibition of K<sup>+</sup>-evoked glutamate release by bicuculline is consistent with other studies.<sup>20-22</sup> In these studies, GABA-evoked responses in the vagus nerve *in vitro* were inhibited with IC<sub>50</sub> values of 6.1 and 1.2 μM, respectively. Although it has been suggested that bicuculline acts on more than the GABA<sub>A</sub> receptor within the central nervous system, perhaps on dopaminergic midbrain sys-

tems ( $IC_{50}$  of 26  $\mu M$ ),<sup>22</sup> we feel it is unlikely that the effects we observed in this study are explained by non-GABA<sub>A</sub> actions of bicuculline.

Total peak serum concentrations of anesthetic agents vary considerably between studies and among different species. Peak serum concentrations for ketamine, propofol, thiopental, and pentobarbital of 9–94, 35, 380, and 200  $\mu M$ , respectively, have been reported.<sup>23,24</sup> Protein binding variably reduces these concentrations. In addition, these may not represent target site (brain) concentrations because propofol has been shown to be concentrated approximately eightfold in the brain.<sup>25</sup> The clinical relevance of *in vitro* studies can always be questioned; however, the concentrations used in our study represent those that are clinically achievable.  $EC_{50}$  values for ketamine and thiopental of 18.2 and 10.9  $\mu M$  fall well within the range of values noted previously, even when corrected for protein binding.

Not all barbiturates inhibit glutamate release. Wei *et al.*<sup>26</sup> reported that [5-(2-cyclohexylidene-ethyl barbituric acid) (CHEB), a convulsant barbiturate, stimulates glutamate release from rat cerebrocortical synaptosomes with an  $EC_{50}$  of 14.2  $\mu M$ . In addition, pentobarbital and phenobarbital inhibited this CHEB-evoked release. The inhibitory effect of ketamine on glutamate release is well recognized as an NMDA receptor-mediated event. In a model of neonatal rat spinal cord, Brockmeyer and Kendig<sup>27</sup> showed a dose-dependent inhibitory effect of ketamine on glutamate release and ventral root potential, which constitute an NMDA receptor-mediated phenomenon. Importantly, dorsal root potential, a GABA receptor-mediated phenomenon, was unaffected by ketamine. However, the action of ketamine on glutamatergic transmission is more complex than simple inhibition. A study of glutamatergic neurotransmission in the prefrontal cortex of conscious rats indicated that low doses of ketamine increased glutamatergic transmission by an action of non-NMDA postsynaptic receptors, but that higher anesthetic doses similar to those used in our study decreased glutamate release.<sup>28</sup> More recently, it has been shown that thiopental and methohexital reduce glutamate release from and  $Ca^{2+}$  entry into cultured neurons.<sup>29</sup>

We have shown that 10  $\mu M$  propofol produces a substantial inhibition of 46 mM  $K^+$ -evoked glutamate release. However, in a study of hypoxemia-induced glutamate release from rat brain slices, Bickler *et al.*<sup>11</sup> failed to detect an inhibition of glutamate release with propofol. The variability of glutamate release in response to propofol is further illustrated in the findings of Ratnakumari

and Hemmings,<sup>30</sup> who reported that propofol inhibited veratridine- and 4-aminopyridine-evoked glutamate release (both  $Na^+$  channel-dependent processes). However, propofol did not inhibit  $K^+$ -evoked glutamate release (a  $Na^+$  channel-independent process) up to 100  $\mu M$ . The reason for the difference between these results and our findings of inhibition of  $K^+$ -evoked glutamate release by propofol is unclear but may be related to the different experimental models. These investigations used a rat cerebrocortical synaptosome preparation, which may not have contained the complete circuitry of excitatory and inhibitory interneurons, in contrast to our model using rat cerebrocortical slices.

The precise role of glutamate release in the mechanism of general anesthesia remains to be fully elucidated. Although most studies support a role for glutamate release in the mechanism of volatile agent anesthesia,<sup>31–33</sup> a recent study using cyclobutane derivatives with anesthetic and nonanesthetic properties found that both anesthetic and nonanesthetic compounds strongly inhibited glutamate release, but only the nonanesthetic compound inhibited  $K^+$ -evoked GABA release, suggesting that inhibition of excitatory neurotransmission may be less important than activation of inhibitory neurotransmission in the primary action of general anesthetics.<sup>34</sup> This is consistent with our observation in the current study that inhibition of  $K^+$ -evoked glutamate release by thiopental and propofol is reversed by bicuculline, a GABA<sub>A</sub> antagonist. In humans, clinical anesthesia induced by NMDA antagonists such as ketamine differs in some qualitative respects from that induced by thiopental and propofol. Ketamine anesthesia is characterized by “dissociative anesthesia,” with analgesia, sedation, and detachment. Thiopental and propofol are noted for profound depression of consciousness and lack of analgesic effects.<sup>2,3</sup> This is consistent with our laboratory finding that ketamine inhibits glutamate release in a manner unrelated to that of thiopental and propofol. Further studies are warranted to determine the neuronal circuitry involved in GABA-mediated inhibition of glutamate release. Using this model, it will be interesting to determine whether volatile agent inhibition of glutamate release is bicuculline sensitive.

A variety of commonly used intravenous anesthetic agents have been shown to depress the  $K^+$ -evoked release of the excitatory neurotransmitter glutamate. The inhibition produced by thiopental and propofol is probably secondary to activation of GABA<sub>A</sub> receptors.

## ANESTHETIC INHIBITION OF GLUTAMATE RELEASE AND BICUCULLINE

## References

- Sheng M: Glutamate receptors put in their place. *Nature* 1997; 386:221-3
- Hudspith MJ: Glutamate: A role in normal brain function, anaesthesia, analgesia and CNS injury. *Br J Anaesth* 1997; 78:731-47
- Pocock G, Richards CD: Excitatory and inhibitory synaptic mechanisms in anaesthesia. *Br J Anaesth* 1993; 71:134-47
- Koblin DD, Chortkoff BS, Laster MJ, Eger EI, Halsey MJ, Ionescu P: Polyhalogenated and perfluorinated compounds that disobey the Meyer-Overton hypothesis. *Anesth Analg* 1994; 79:1043-8
- Griffiths R, Norman R: Effects of anaesthetics on uptake, synthesis and release of neurotransmitters. *Br J Anaesth* 1993; 71:96-107
- Franks NP, Lieb WR: Molecular and cellular mechanisms of anaesthesia. *Nature* 1994; 367:607-14
- Jones MV, Brookes PA, Harrison NL: Enhancement of GABA activated Cl currents in cultured rat hippocampal neurones by three volatile anaesthetics. *J Physiol* 1992; 449:279-93
- McIver MB, Amagasu SM, Mikulec AA, Monroe FA: Riluzole anaesthesia: Use dependent block of presynaptic glutamate fibres. *ANESTHESIOLOGY* 1996; 85:626-34
- Mantz JM, Cheramy A, Thierry AM, Glowinski J, Desmonts JM: Anaesthetic properties of riluzole (54274 RP), a new inhibitor of glutamate transmission. *ANESTHESIOLOGY* 1992; 76:844-8
- Berg-Johnsen J, Langmoen IA: The effect of isoflurane on excitatory synaptic transmission in the rat hippocampus. *Acta Anaesth Scand* 1992; 36:350-5
- Bickler PE, Buck LT, Feiner JR: Volatile and intravenous anaesthetics decrease glutamate release from cortical brain slices during anoxia. *ANESTHESIOLOGY* 1995; 83:1253-60
- Nicol B, Rowbotham DJ, Lambert DG: Glutamate uptake is not a major target site for anaesthetic agonists. *Br J Anaesth* 1995; 75:61-5
- Nicholls DG, Sihra T, Sanchez-Prieto J: Calcium dependent and independent release of glutamate from synaptosomes monitored by continuous fluorometry. *J Neurochem* 1987; 49:50-7
- Pistis M, Belelli D, Peters JA, Lambert JJ: The interaction of general anaesthetics with recombinant GABA<sub>A</sub> and glycine receptors expressed in *Xenopus laevis* oocytes: A comparative study. *Br J Pharmacol* 1997; 122:1707-9
- Parker I, Gundersen CB, Miledi R: Actions of pentobarbital on rat brain receptors expressed in *Xenopus* oocytes. *J Neurosci* 1986; 6:2290-7
- Hales TG, Lambert JJ: The actions of propofol on inhibitory amino acid receptors of bovine adrenomedullary chromaffin cells and rodent central neurons. *Br J Pharmacol* 1991; 104:619-28
- Mihic SJ, Ye Q, Wick MJ, Koltchine VV, Krasowski MD, Finn SE, Mascia MP, Valenzuela CF, Hanson KK, Greenblatt EP, Harris RA, Harrison NL: Sites of alcohol and volatile anaesthetic action on GABA<sub>A</sub> receptors. *Nature* 1997; 389:385-9
- Wakasugi M, Hirota K, Roth S, Ito Y: The effects of general anaesthetics on excitatory and inhibitory synaptic transmission in area CA1 of the rat hippocampus in vitro. *Anesth Analg* 1999; 88:676-80
- McIver MB, Mikulec AA, Amagasu SM, Monroe FA: Volatile anaesthetics depress glutamate transmission via presynaptic actions. *ANESTHESIOLOGY* 1996; 85:823-34
- Javors MA, King TS, Chang X, Ticku MK, Levinson C: Characterisation of chloride efflux from GT1-7 neurons: Lack of effect of ethanol on GABA response. *Brain Res* 1998; 780:183-9
- Green MA, Halliwell RF: Selective antagonism of the GABA<sub>A</sub> receptor by ciprofloxacin and biphenylacetic acid. *Br J Pharmacol* 1997; 122:584-90
- Seutin V, Scuvée-Moreau J, Dresse A: Evidence for a non-GABAergic action of quaternary salts of bicuculline on dopaminergic neurones. *Neuropharmacol* 1997; 36:1653-7
- Hirota K, Okawa H, Appadu B, Grandy DK, Devi L, Lambert DG: Stereoselective interaction of ketamine with recombinant  $\mu$ ,  $\delta$  and  $\kappa$  opioid receptors expressed in Chinese hamster ovary cells. *ANESTHESIOLOGY* 1999; 90:174-82
- Frenkel C, Duch DS, Urban BW: Effects of i.v. anaesthetics on human brain sodium channels. *Br J Anaesth* 1993; 71:15-24
- Shyr MH, Tsai TH, Tan PP, Chen CF, Chan SH: Concentration and regional distribution of propofol in brain and spinal cord during propofol anaesthesia in the rat. *Neurosci Lett* 1995; 184:212-5
- Wei L, Schlame M, Downes H, Hemmings HC: CHEB, a convulsant barbiturate, evokes calcium dependent spontaneous glutamate release from rat cerebrocortical synaptosomes. *Neuropharmacol* 1996; 35:695-701
- Brockmeyer DM, Kendig JJ: Selective effects of ketamine on amino-acid mediated pathways in neonatal rat spinal cord. *Br J Anaesth* 1995; 74:79-84
- Moghaddam B, Adams B, Verma A, Daly D: Activation of glutamatergic neurotransmission by ketamine: A novel step in the pathway from NMDA receptor blockade to dopaminergic and cognitive disruptions associated with the prefrontal cortex. *J Neurosci* 1997; 17:2921-7
- Miao N, Nagao K, Lynch C: Thiopental and methohexital depress Ca<sup>2+</sup> entry into and glutamate release from cultured neurons. *ANESTHESIOLOGY* 1998; 88:1643-53
- Ratnakumari L, Hemmings HC: Effects of propofol on sodium channel dependent sodium influx and glutamate release in rat cerebrocortical synaptosomes. *ANESTHESIOLOGY* 1997; 86:428-39
- Kirson ED, Yaari Y, Perouansky M: Presynaptic and postsynaptic actions of halothane at glutamatergic synapses in the mouse hippocampus. *Br J Pharmacol* 1998; 124:1607-14
- Eilers H, Kindler C, Bickler PE: Different effects of volatile anaesthetics and polyhalogenated alkanes on depolarisation-evoked glutamate release in rat cortical brain slices. *Anesth Analg* 1999; 88:1168-74
- Schalme M, Hemmings HC: inhibition by volatile anaesthetics of endogenous glutamate release from synaptosomes by a pre-synaptic mechanism. *ANESTHESIOLOGY* 1995; 82:1406-16
- Liachenko S, Tang P, Somogyi GT, Xu Y: Comparison of anaesthetic and non-anaesthetic effects on depolarisation-evoked glutamate and GABA release from mouse cerebrocortical slices. *Br J Pharmacol* 1998; 123:1274-80
